# Supplementary material for: Anti-solvent dependent device performance in CH3NH3PbI3 solar cells: the role of intermediate phase content in the as-prepared thin films
Source: Royal Society of Chemistry journal article supplement (doi:10.1039/c7se00125h), 2017-01-01
Supplement: c7se00125h1.pdf [file c7se00125h1.pdf]

**Electronic supplementary information**

**Anti-solvent dependent device performance in  $\text{CH}_3\text{NH}_3\text{PbI}_3$  solar cells: the role of intermediate phase content in as-prepared thin films†**

Yang Li,<sup>a,b</sup> Jianan Wang,<sup>c,d</sup> Yi Yuan,<sup>\*c</sup> Xiandui Dong<sup>a</sup> and Peng Wang<sup>\*c</sup>

---

<sup>a</sup> Changchun Institute of Applied Chemistry, Chinese Academy of Sciences, Changchun, 130022, China.

<sup>b</sup> University of Chinese Academy of Sciences, Beijing, 100049, China

<sup>c</sup> Department of Chemistry, Zhejiang University, Hangzhou, 310028, China. E-mail: yyuan@zju.edu.cn; pw2015@zju.edu.cn.

<sup>d</sup> School of Materials Science and Engineering, Harbin Institute of Technology, Harbin 150001, China.

**Table S1** Fitting parameters of dynamic spectra of films made with different anti-solvents

| Solvent | PL            |       |               |       |                                | TA                 |                     |
|---------|---------------|-------|---------------|-------|--------------------------------|--------------------|---------------------|
|         | $\tau_1$ [ns] | $A_1$ | $\tau_2$ [ns] | $A_2$ | $\tau_{av}$ <sup>a)</sup> [ns] | $\tau_{rise}$ [ps] | $\tau_{decay}$ [ns] |
| DCM     | 4.5           | 0.31  | 42            | 0.69  | 30                             | 0.65               | 1.5                 |
| TL      | 5.1           | 0.23  | 57            | 0.77  | 45                             | 0.54               | 2.8                 |
| DE      | 7.6           | 0.15  | 72            | 0.85  | 62                             | 0.56               | 5.7                 |

<sup>a)</sup>  $\tau_{av}$  was obtained with eqn  $\tau_{av} = A_1\tau_1 + A_2\tau_2$ .

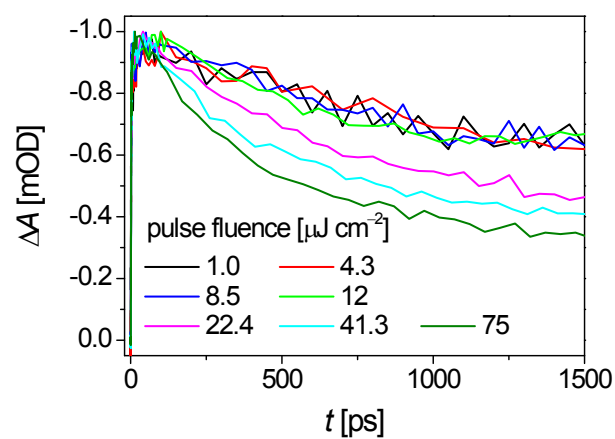

**Fig. S1** Pump fluence dependent kinetics probed at 760 nm for  $\text{CH}_3\text{NH}_3\text{PbI}_3$  film. There is no difference between the TA kinetics under  $12 \mu\text{J cm}^{-2}$  of pump fluence, which indicates that the Auger recombination and the non-geminate bimolecular recombination are insignificant .

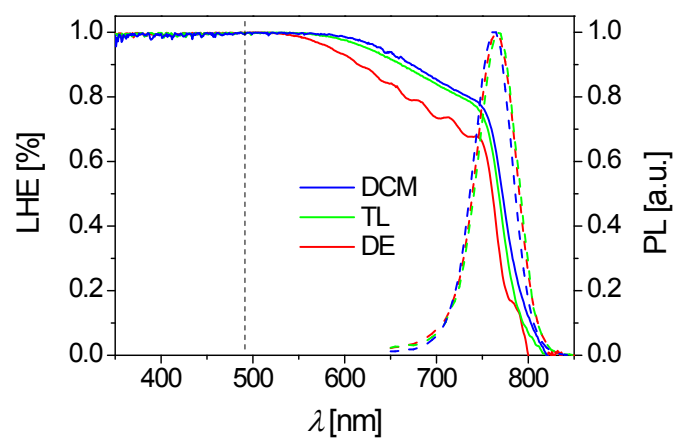

**Fig. S2** Light-harvesting efficiencies and PL spectra. Light-harvesting efficiency was deprived from eqn  $LHE = 1 - 10^{-A\lambda}$ .
